# Supplementary material for: Formation of jellyfish-like Ag(0)x–Mn3O4 microglobules at the surface of Ag(i) and Mn(ii) nitrate solution with NH3 vapor
Source: Royal Society of Chemistry journal article supplement (doi:10.1039/d4ce01035c), 2024-11-26
Supplement: d4ce01035c1.pdf [file d4ce01035c1.pdf]

## Formation of jellyfish-like $\text{Ag}(0)_x\text{-Mn}_3\text{O}_4$ microglobules at the surface of $\text{Ag}(\text{I})$ and $\text{Mn}(\text{II})$ nitrate solution with $\text{NH}_3$ vapor

Larisa B. Gulina,<sup>\*a</sup> Kirill A. Nikiforov,<sup>a</sup> Ghenadii Korotcenkov,<sup>b</sup> and Valeri P. Tolstoy<sup>a</sup>

<sup>a</sup> Institute of Chemistry, Saint Petersburg State University, Saint Petersburg, Russia.

<sup>b</sup> Department of Physics and Engineering, Moldova State University, Chisinau, Moldova.

\* Corresponding author e-mail: l.gulina@spbu.ru

Analysis of the structure compositions given in SI suggests that at the treatment beginning, the topping structure “head” is formed with the higher silver content (S1 EDX spectrum of the sample obtained during 7 minutes of treatment). With increasing reaction duration, the Ag/Mn ratio decreases (S2) and almost equalizes at the periphery of the topping (S3). As for the lower part, the “tail” of the formed structures, the Ag/Mn ratio is slightly higher (S4) than in the upper part (S3), which is consistent with the model of growth propagation from the surface to the depth of the solution. Moreover, the Ag/Mn ratio becomes high in the lower, growing part of the “jellyfish tentacles” (S5-S6). It can be seen from the images and spectra (S6-S7) that some parts of the 1D structures remain almost uncovered by manganese oxide.

**Table S1.** SEM images, EDX spectra and compositions of  $\text{Ag}(0)_x\text{-Mn}_3\text{O}_4$  structures

| Image                                                                               | Spectrum                                                                             | Composition |                      |
|-------------------------------------------------------------------------------------|--------------------------------------------------------------------------------------|-------------|----------------------|
|                                                                                     |                                                                                      | Element     | Weight %<br>Atomic % |
| 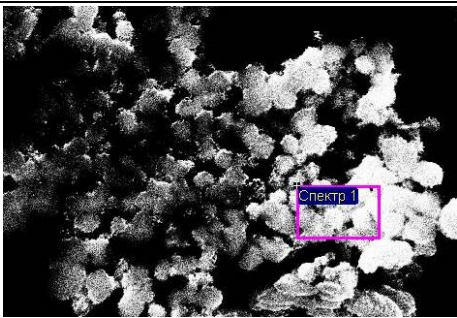 |  | C K         | 3.54   9.79          |
|                                                                                     |                                                                                      | O K         | 20.30   42.20        |
|                                                                                     |                                                                                      | Al K        | 23.61   29.10        |
|                                                                                     |                                                                                      | Mn K        | 9.10   5.51          |
|                                                                                     |                                                                                      | Ag L        | 43.45   13.40        |
| <b><math>\text{Ag}(0)_{7.3}\text{-Mn}_3\text{O}_4</math></b>                        |                                                                                      |             |                      |
|  |  | C K         | 2.09   6.22          |
|                                                                                     |                                                                                      | O K         | 28.11   62.89        |
|                                                                                     |                                                                                      | Al K        | 1.00   1.33          |
|                                                                                     |                                                                                      | Mn K        | 21.03   13.70        |
|                                                                                     |                                                                                      | Ag L        | 47.78   15.86        |
| <b><math>\text{Ag}(0)_{3.5}\text{-Mn}_3\text{O}_4</math></b>                        |                                                                                      |             |                      |
|  |  | C K         | 2.56   7.13          |
|                                                                                     |                                                                                      | O K         | 27.68   57.93        |
|                                                                                     |                                                                                      | Al K        | 1.77   2.20          |
|                                                                                     |                                                                                      | Mn K        | 38.87   23.69        |
|                                                                                     |                                                                                      | Ag L        | 29.13   9.04         |
| <b><math>\text{Ag}(0)_{1.3}\text{-Mn}_3\text{O}_4</math></b>                        |                                                                                      |             |                      |

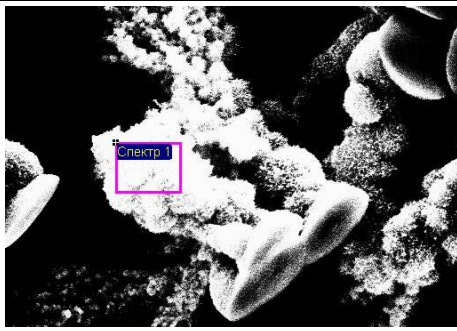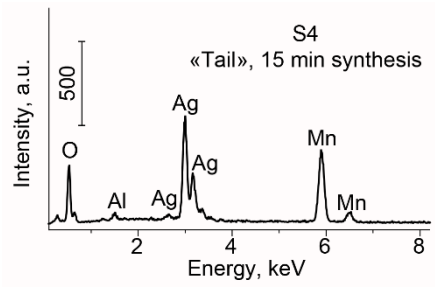

|      |       |       |
|------|-------|-------|
| C K  | 2.19  | 5.82  |
| O K  | 33.03 | 65.96 |
| Al K | 0.84  | 0.99  |
| Mn K | 29.05 | 16.89 |
| Ag L | 34.89 | 10.33 |

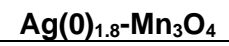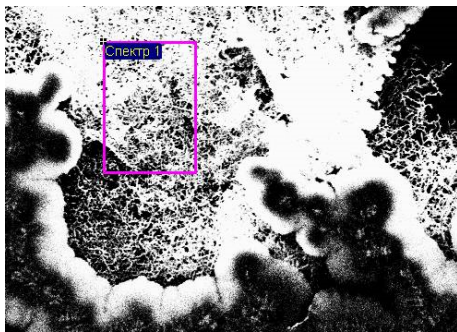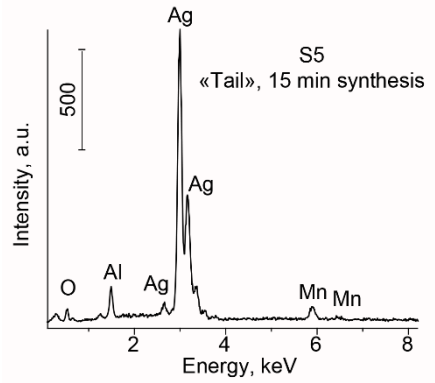

|      |       |       |
|------|-------|-------|
| O K  | 12.07 | 44.19 |
| Al K | 3.54  | 7.67  |
| Mn K | 4.43  | 4.73  |
| Ag L | 79.96 | 43.41 |

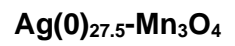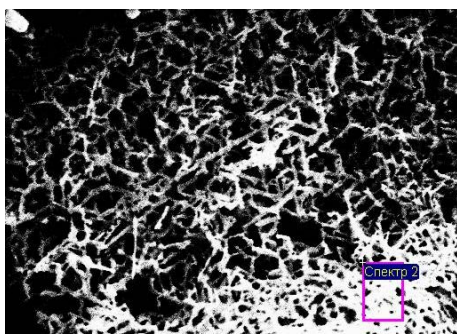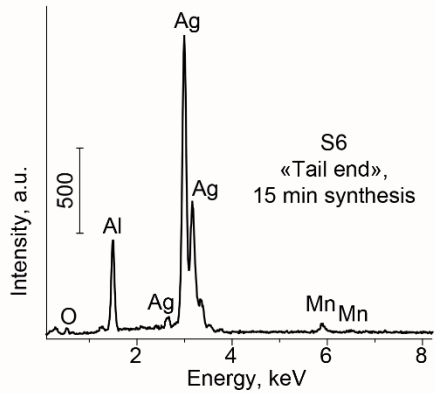

|      |       |       |
|------|-------|-------|
| O K  | 6.01  | 24.21 |
| Al K | 10.21 | 24.37 |
| Mn K | 2.42  | 2.84  |
| Ag L | 81.36 | 48.58 |

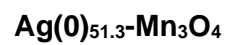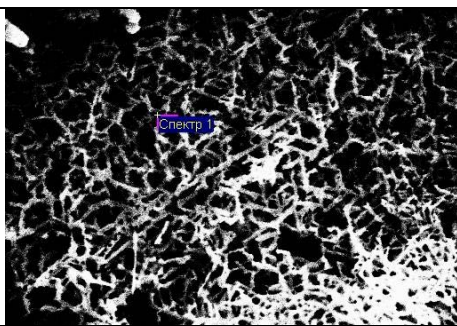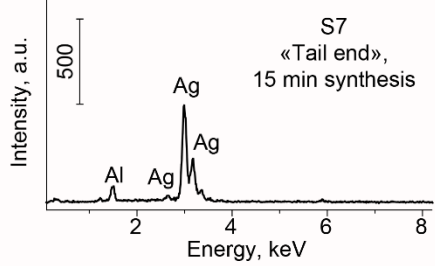

|      |       |       |
|------|-------|-------|
| Al K | 6.01  | 20.35 |
| Ag L | 93.99 | 79.65 |

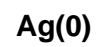

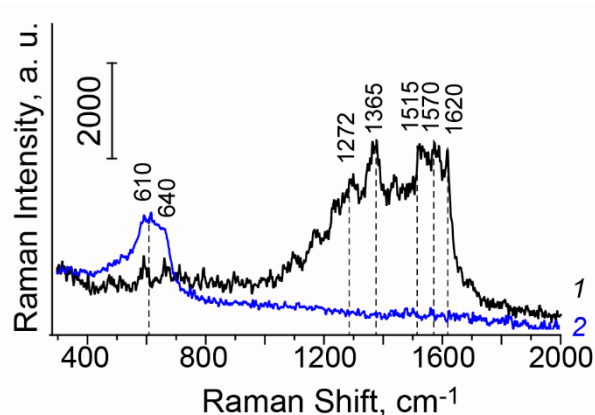

**Figure S1.** Raman spectra of R6G ( $C = 10^{-7}$  mol/l, black curve 1), and R6G ( $C = 10^{-9}$  mol/l, blue curve 2) deposited on Al foil with a layer of  $\text{Ag}(0)_x\text{-Mn}_3\text{O}_4$  nanocomposite.

**Table S2.** Assignment for Raman Spectra of R6G molecule

| Raman shift, $\text{cm}^{-1}$                                                                                                        | Vibration mode                     |                               |
|--------------------------------------------------------------------------------------------------------------------------------------|------------------------------------|-------------------------------|
|                                                                                                                                      | [1]                                | [2]                           |
| 610-613                                                                                                                              | ip XRD; op XRD                     | C-C-C ring in-plane vibration |
| 770-775                                                                                                                              | op C-H bend; ip XRD                | op C-H bend                   |
| 1125                                                                                                                                 |                                    | in C-H bend                   |
| 1180-1184                                                                                                                            | ip XRD; ip C-H bend; ip N-H bend   | in C-H bend                   |
| 1310-1312                                                                                                                            | ip XRB N-H bend; $\text{CH}_2$ wag | in N-H bend                   |
| 1360-1364-                                                                                                                           | XRS; ip C-H bend                   | C-C str.                      |
| 1510                                                                                                                                 | XRS; C-N str; C-H bend; N-H bend   | C-C str.                      |
| 1575-1577                                                                                                                            | XRS; ip N-H bend                   | in N-H bend                   |
| 1651                                                                                                                                 | XRS; ip C-H bend                   | C-C str.                      |
| ip: in plane. op: out of plane. XRD: xanthene ring deformations. XRB: xanthene ring breath. XRS: xanthene ring stretch. str: stretch |                                    |                               |

[1] L. Jensen and G. C. Schatz, J. Phys. Chem. A, 2006, 110, 5973-5977.

[2] C. Wu, E. Chen and J. Wei, Colloids Surf. A, 2016, 506, 450-456.
